# Supplementary material for: Structural and mechanistic insights into a Bacteroides vulgatus retaining N-acetyl-β-galactosaminidase that uses neighbouring group participation
Source: Royal Society of Chemistry journal article supplement (doi:10.1039/c6cc04649e), 2016-01-01
Supplement: c6cc04649e1.pdf [file c6cc04649e1.pdf]

## SUPPORTING INFORMATION

### Structural and mechanistic insights into a *Bacteroides vulgatus* retaining *N*-acetyl- $\beta$ -galactosaminidase that uses neighboring group participation

C. Roth,<sup>a</sup> M. Petricevic,<sup>b</sup> A. John,<sup>c,d</sup> E.D. Goddard-Borger,<sup>c,d,\*</sup> G.J. Davies<sup>a,\*</sup> and S. J. Williams<sup>b,\*</sup>

#### Contents

|                                                                                    |   |
|------------------------------------------------------------------------------------|---|
| Supplementary figures .....                                                        | 2 |
| Figure S1: Sequence of <i>BvGH123</i> . .....                                      | 2 |
| Figure S2: pH activity and inhibitor binding to <i>BvGH123</i> . .....             | 3 |
| Fig. S3 Dimer of <i>BvGH123</i> as observed in the crystal structure. ....         | 4 |
| Fig. S4 Overlay of <i>BvGH123</i> in open and closed conformations. ....           | 4 |
| Experimental .....                                                                 | 5 |
| Cloning and expression .....                                                       | 5 |
| Protein crystallography .....                                                      | 5 |
| Determination of stereochemistry of catalysis by <sup>1</sup> H NMR analysis ..... | 5 |
| Kinetic analysis of <i>BvGH123</i> .....                                           | 5 |
| Size exclusion chromatography-multi-angle laser light scattering .....             | 6 |
| Isothermal titration calorimetry .....                                             | 6 |
| Table S1: SsGH134 X-ray data collection, processing and refinement statistics..... | 7 |
| References .....                                                                   | 8 |

## Supplementary figures

(a)

>ENA|ABR39859|ABR39859.1 *Bacteroides vulgatus* ATCC 8482 conserved hypothetical protein

ATGAAAAAATCTCTATTTCTAGGCGCTCTCTGTTGTCAACAGTATGTATGAACGCCCAAACCTCCGAATATTATCAGGA  
AGCAGCCAATCCTATTTGCCACCAACCCCGCTTTATGGGCGAAAGTTACAGCTCCACAAATCAGCTGGGGAAGCACAGACA  
TCCGCTATAAGAAAGAGGAACCGGCTCCCATCCATAGTGCAGCAAAAAGTATGAATCTTACTGCATGGAAAGGTGAGAAA  
ATTTACAGCCCACTGGTAGTATGGACTCCCAAAGTGCTAAATGACTTGACTTTCATGGTCAGCGATTAAACCTCAGGCAG  
TGCAACCATCAGTAAAGAGAATATCCGAACAGGCTTTGTCCGTTACGTTATAACCGATGAACGAAAGATGGTTTGG  
GCGCATGCGGCTATCGAAACAGTGCTGATTTGACTCAACTTTAGTAGCAGATGTAATAGACCATATCACTCCTACTCTA  
ACCCTTCCCGCCAACCTCCACCAAGGGGATGGATCAGCGTAAACATCCCTCAGGGCACTAAAGCCGGGAAATACACAGG  
AACCCTCACAGTGAAGCCGACGGTATCACCTTGTCTGAATTTAAACTGAACCTCCAAGTGAAGAACCCTACTCTGCCTC  
CTCCTTCCGAATGGGCTTTTCATCTGGATTTATGGCAGAACCTTTATGCAGTATCCCGTTACTACAATGTGGAACCGTTC  
AGCAAAAAACATTTTCGATTTGATGCGCCCATTTGATGAACTGTATGCCGATGCAGGTGGTAAGGTAAATCACAGCCTCCAT  
TATGCACAAGCCTTGGAAACGGACAGACCTATGATGCTTTTGAAAGCATGGTCACCTGGTTGAAAAAAGCGGATGGAACCT  
GGTATTTTGTACTATACCGTATTCGACAAGTGGGTGGAATTTATGATGGATCTTGGTGTCAAAAAACAAATCAGTTGCTAT  
TCTATGGTTCCCTGGGCGCTTTCTTTCCAAATTTTTGATCAGGCCAGCAACTCTTTCAAATTTTGGACGCCAAACCGGG  
TGAAGTTGCTTATGAAGAATTTTGGATGAATATGCTGCAAGATTTCTCAAAGCATCTGAAAGCAAAAGGCTGGTTCGATA  
TCACTCACATTGCGATGGACGAACGCCCGATGAAGGACATGCAGGAACACTGAAAGTGATCCGTAAGGCTGATAAAGAC  
TTTAAAGTTTCTTTGGCAGGAACCTATCACAAAGAACTATTTGGATGATCTGAATGATTATTGTATCACCATTGCCGAGAA  
ATTTACTCCCGAAGAGATTGAAGCGCGCCGGAAGGCAGGCAAGTAAGTAAGTACTATTATACCTGCTGCACAGAGCCCCGCC  
CCAACACTTTCACTTTTCAGCGAACCTGCCGAAGCTGAATGGCTGGCATGGCATAGTGCAGAAAGAAAATCTGGACGGATAT  
CTTCGTTGGGCTTTAAACAGCTGGGTGAAAAATCCCTACAAGACAGCCGTTTCACAGCTTGGGCTGCCGGAGACACGTA  
TATGATTTATCCGGGCGCCGTTTCATCCATCCGCTGGAACGCCTGACAGAAGGAATACAATTTTTTGAGAAAGTACGCA  
TTCTGAAAGAGAATTTGAAGAAAAAGGCAATAAAGGAGCTATTAAGAATATAGACAAAACCTTGAAATGTTTGATGAA  
TCAAGCATGGATAAGATTTCTCTACCCTGCCGTAACAAAGCAAAAAAGTTATCAACCGATACTAG

**Predicted translation:**

MKKLLFLGALLLSTVCMNAQTSEYYQEAANPIATNPALWAKVTAPQISWGSTDIRYKKEE  
PAPIHSAQKSMNLTAWKGEKISAQLVVWTPKVLNDLTFMVS~~DLT~~SGSATISKENIR~~TG~~FGV  
RYVITDELNKDGLGACGYRNSADFDSTLVADVIDHITPTLTPANSTQGGWISVNI~~PQ~~GT  
KAGKYTGTVTVKADGITLSELKLNQVKNRTLPPPS~~E~~WAFHLDLWQNPYAVSRYYNVEPF  
SKKHFDLMRPLMKLYADAGGKVITASIMHKPWNGQTYDAFESMVTWLKKADGTWYFDYTV  
FDKWVEFMMDLG~~V~~KKQISCYSMVPWRLSFQYFDQASNSFKFLDAKPGEVAYEEFWMNMLQ  
DFSKHLKAKGWF~~D~~ITHIAM~~DER~~PMKDMQETLKVIRKADKDFKVSLAGTYHKELLDLNDY  
CITIAEKFTPEEIEARRKAGKVTTYTCCTEPRPNTFTFSEPAEAEWLAWHSAKENLDGY  
LRWALNSWVNPLQDSRFTAWAAGDTYMIYPGARSSIRLERL~~TE~~GIQFFEKVRILKEEFE  
EKGNGKA~~IK~~NIDKTLKMFDESSMDKISPTTAVNKAKKVINRY\*

underlined = signal peptide

(b)

>His6-BvGH123:

MHHHHHHLEVL~~FQ~~GPQTSEYYQEAANPIATNPALWAKVTAPQISWGSTDIRYKKEE  
PAPIHSAQKSMNLTAWKGEKISAQLVVWTPKVLNDLTFMVS~~DLT~~SGSATISKENIR~~TG~~FGV  
RYVITDELNKDGLGACGYRNSADFDSTLVADVIDHITPTLTPANSTQGGWISVNI~~PQ~~GT  
KAGKYTGTVTVKADGITLSELKLNQVKNRTLPPPS~~E~~WAFHLDLWQNPYAVSRYYNVEPF  
SKKHFDLMRPLMKLYADAGGKVITASIMHKPWNGQTYDAFESMVTWLKKADGTWYFDYTV  
FDKWVEFMMDLG~~V~~KKQISCYSMVPWRLSFQYFDQASNSFKFLDAKPGEVAYEEFWMNMLQ  
DFSKHLKAKGWF~~D~~ITHIAM~~DER~~PMKDMQETLKVIRKADKDFKVSLAGTYHKELLDLNDY  
CITIAEKFTPEEIEARRKAGKVTTYTCCTEPRPNTFTFSEPAEAEWLAWHSAKENLDGY  
LRWALNSWVNPLQDSRFTAWAAGDTYMIYPGARSSIRLERL~~TE~~GIQFFEKVRILKEEFE  
EKGNGKA~~IK~~NIDKTLKMFDESSMDKISPTTAVNKAKKVINRY

Underlined = hexahistidine tag

### Figure S1: Sequence of BvGH123.

(a) Predicted protein sequence of BvGH123. (b) Recombinant BvGH123 protein sequence, consisting of an N-terminal hexahistidine tag fused to the catalytic domain without signal peptide. The general acid/base and stabilizer residues are in bold.

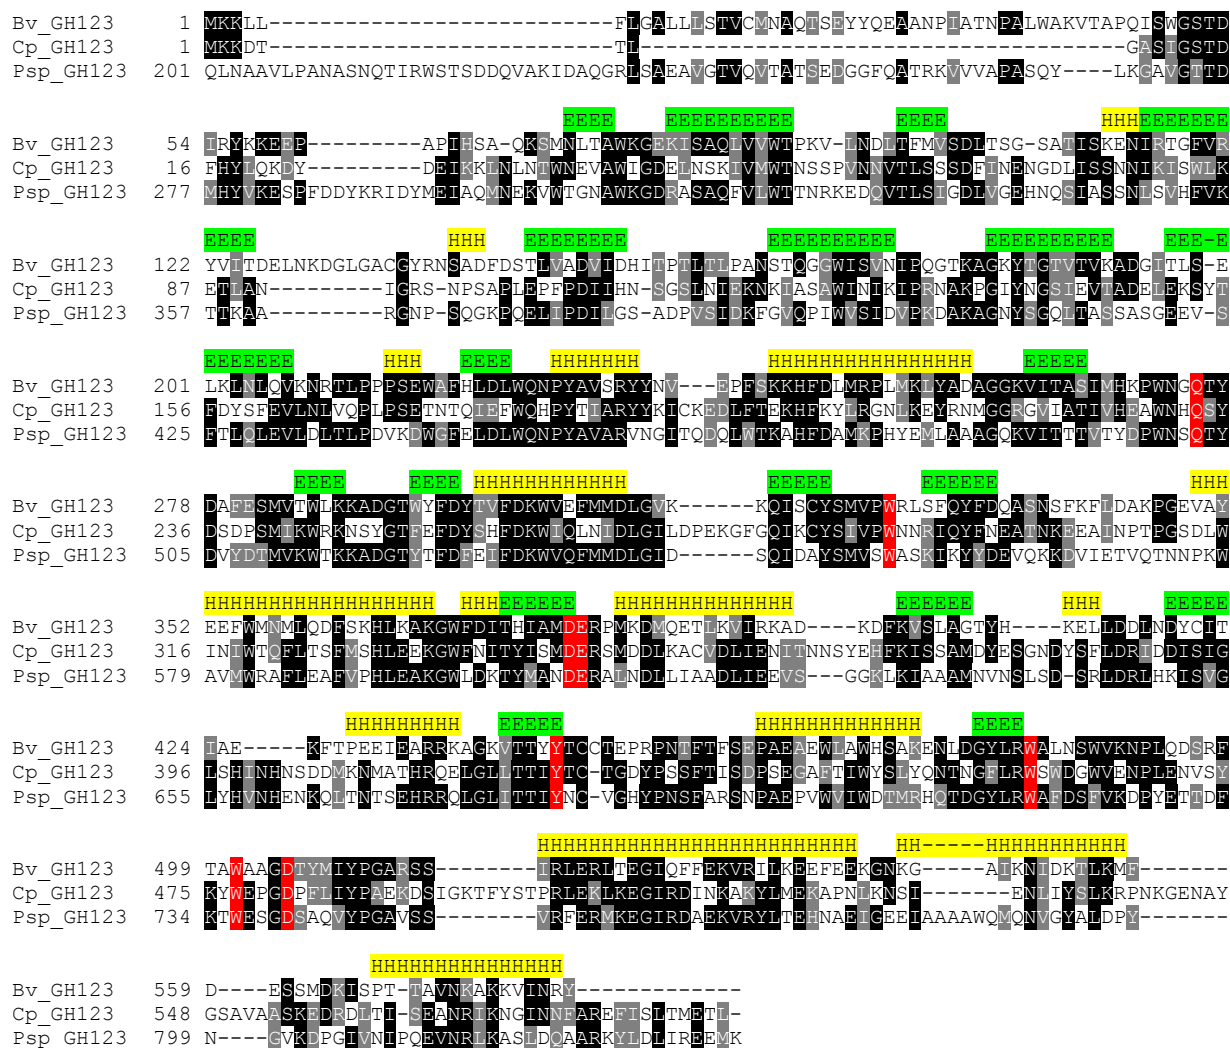

**Figure S2: Sequence alignment of biochemically-characterized family GH123 sequences.**

The characterized GH123s from *Bacteroides vulgatus* ATCC 8482 (ABR39859.1), *Clostridium perfringens* ATCC 13124 (ABG82546.1) and *Paenibacillus* sp. TS12 (BAJ83606.1) were aligned using ClustalW. The secondary structure of the *B. vulgatus* enzyme, as determined by the structure reported in this work, is shown above the alignment. Residues interacting with the substrate are highlighted in red.

(a)

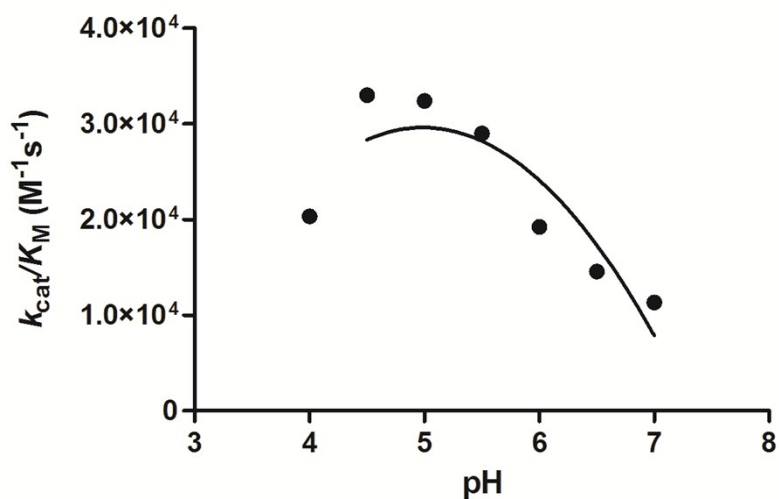

(b)

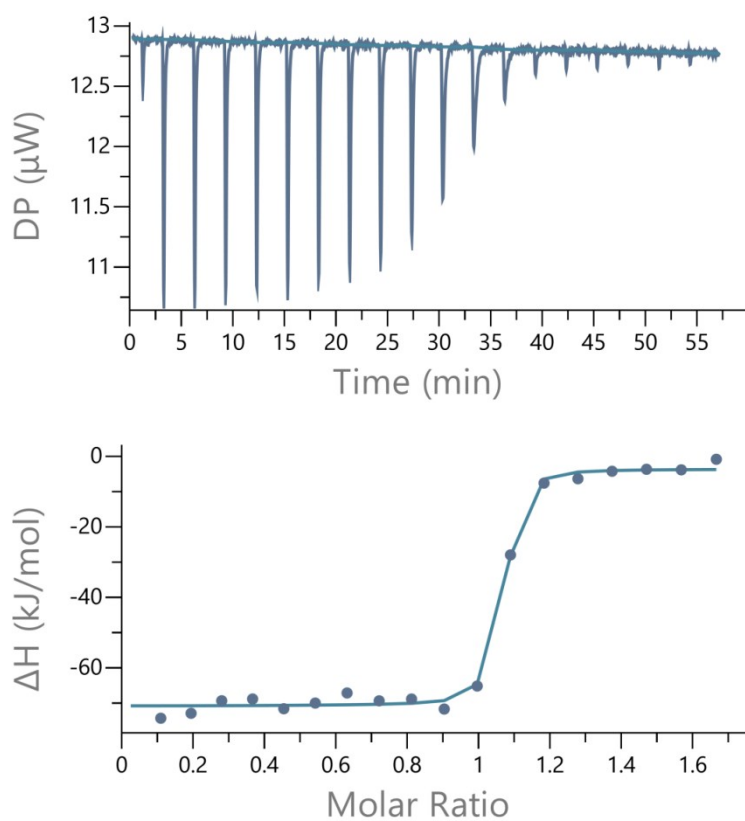

**Figure S3: pH activity and inhibitor binding to BvGH123.**

(a) pH dependence of activity for BvGH123 using pNPGalNAc as substrate.  $k_{cat}/K_M$  values were determined by the substrate depletion method. See the Experimental section for further details. (b) Isothermal titration calorimetry of Gal-thiazoline binding to BvGH123.

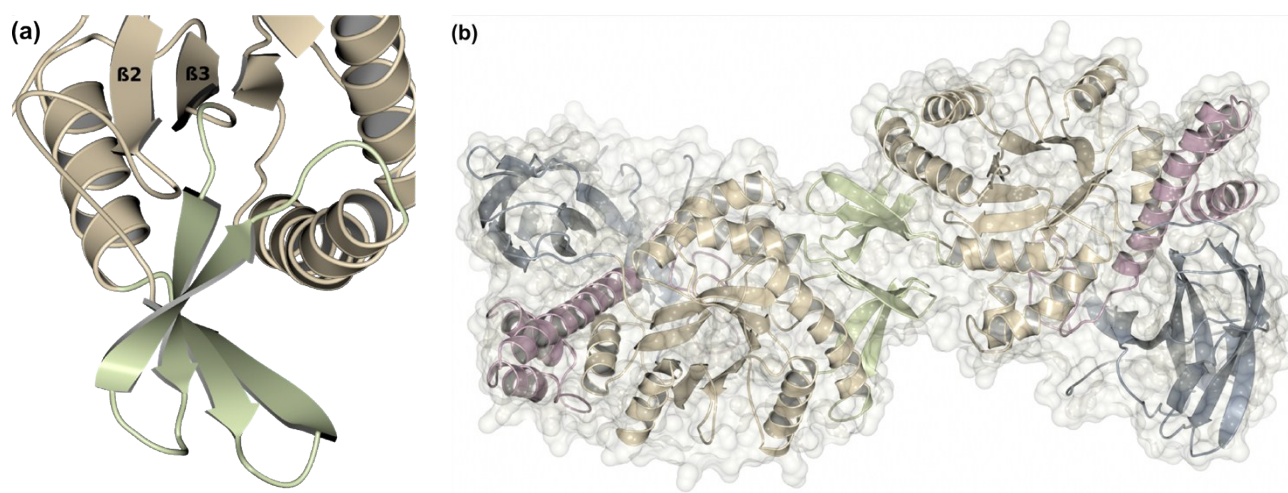

**Fig. S4 Dimer of *BvGH123* as observed in the crystal structure.**

(a)  $\beta$ -wing domain formed by insertion of a 4 stranded  $\beta$ -sheet between the  $\beta 3$  and 4 of the  $(\beta\alpha)_8$ -barrel. (b) Crystallographic dimer observed for *BvGH123*

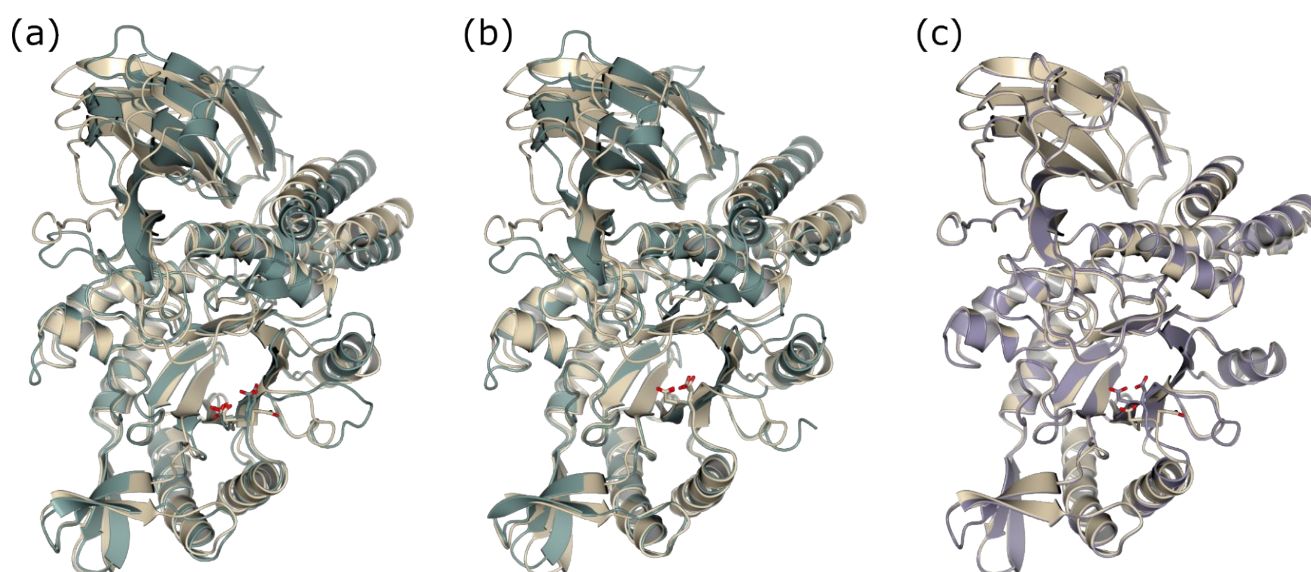

**Fig. S5 Overlays of *BvGH123* in open and closed conformations, and with *CpNga123*.**

Overlay of open (a) and closed (b) conformations of *BvGH123* (wheat) and *CpNga123* (slate gray). (c) Overlay of open (wheat) and closed (plum) form of *BvGH123*. The active site residues D361 and E362 are shown in stick representation. The overlay was based on the TIM-barrel domains.

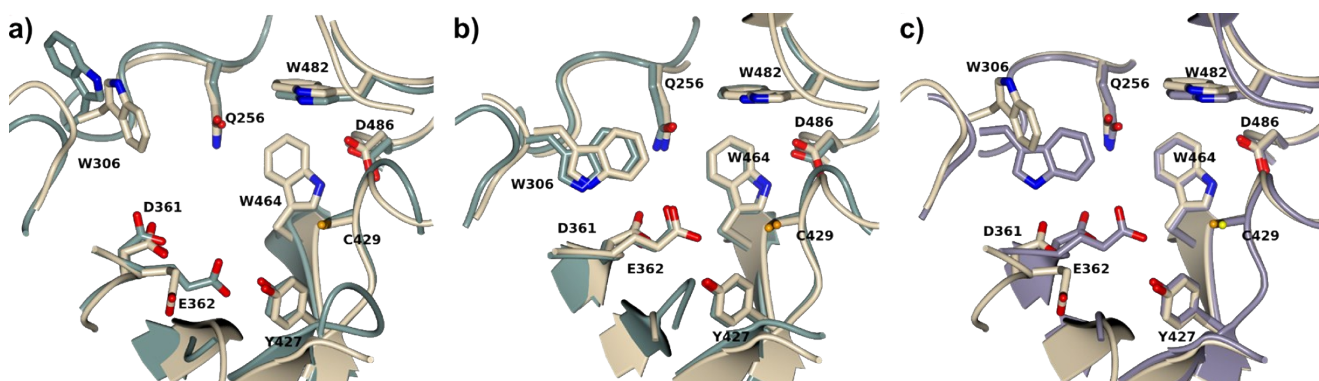

**Fig. S6 Zoom of overlay of *BvGH123* and *CpNga123* in open and closed conformations.**

Overlay of open (a) and closed (b) conformations of *BvGH123* (wheat) and *CpNga123* (slate gray).  
(c) Overlay of *BvGH123* in open (wheat) and closed (slate gray).

## Experimental

### Cloning and expression

The gene of *BvGH123*, encoding the mature protein sequence, was amplified from genomic DNA of *B. vulgatus* DSM 1447 and cloned in YSBL3CLIC creating a construct with an N-terminal cleavable His-Tag<sup>1</sup>. Protein expression was carried out in TB-medium. For the production of selenomethionine containing protein the gene was transformed in *E. coli* B384 and the cells were grown in minimal medium, using autoinduction to induce protein synthesis<sup>2,3</sup>. *BvGH123* was purified in a two-step procedure using IMAC and then gel filtration. Fractions containing *BvGH123*, eluting as a dimer, were combined and concentrated to approx 25 mg/ml and stored at  $-80^{\circ}\text{C}$ .

### Protein crystallography

Initial crystallisation conditions were established using commercial sparse matrix screens from Hampton Research and Molecular Dimensions. Subsequently crystals were optimised in 48 well screen sitting drop with a protein concentration of 7.5 mg/ml.

Data were collected at the Diamond Light source (Didcot UK). Data were indexed and integrated using XDS<sup>4</sup> as part of Xia2<sup>5</sup> and subsequently scaled using AIMLESS<sup>6</sup>. The experimental phasing was done using the Crank2 pipeline within i2 of the CCP4 software package<sup>7,8,9</sup>. The partial structure was then further refined against a higher resolution native dataset. The model was further improved by alternating cycles of manual model building in real space with Coot and reciprocal space refinement with Refmac5<sup>10,11</sup>. The quality of the final models was judged using Molprobit<sup>12</sup>.

### Determination of stereochemistry of catalysis by $^1\text{H}$ NMR analysis

*BvGH123* catalysed hydrolysis of pNPGalNAc was monitored by  $^1\text{H}$  NMR spectroscopy using a 500 MHz instrument. A solution of *BvGH123* in buffered  $\text{D}_2\text{O}$  (0.15 ml, 0.095 mM in 10 mM sodium phosphate, pD 7.4) was added to a solution of pNPGalNAc (4.0 mg, 19.3 mmol) in buffered  $\text{D}_2\text{O}$  (0.6 ml, 10 mM sodium phosphate, pD 7.4) at  $25^{\circ}\text{C}$ .  $^1\text{H}$  NMR spectra were acquired at time points ( $t = 0, 3, 22$  and  $38$  min,  $20$  h).

### Kinetic analysis of *BvGH123*

**pH dependence of activity.**  $k_{\text{cat}}/K_{\text{M}}$  values for *BvGH123* were measured for pNPGalNAc hydrolysis using the substrate depletion method in a stopped assay. Reactions (500  $\mu\text{l}$ ) were performed in 50 mM citrate/phosphate buffer, 150 mM NaCl at a range of pH values (4.0, 4.5, 5.0, 5.5, 6.0, 7.0) at  $37^{\circ}\text{C}$ . Reactions were initiated by the addition of 10  $\mu\text{l}$  of 0.106  $\mu\text{M}$  *BvGH123* to pNPGalNAc (0.4 mM) in buffer, and aliquots (25  $\mu\text{l}$ ) were quenched at different time points into 75  $\mu\text{l}$  glycine buffer (1 M, pH 10.0) in a 96-well plate. Absorbances were measured using a UV/visible plate reader ( $\lambda = 405$  nm). Data (absorbance at 400 nm against time) were fitted to a first order rate equation ( $A_t = A_0 (1 - e^{-kt}) + \text{offset}$ , where  $A_t$  is the absorbance at time  $t$ ,  $A_0$  is the absorbance at time 0 and  $k$  is the rate constant) using the Prism 6 software package (Graphpad Scientific Software), to give values of  $V_{\text{max}}/K_{\text{M}}$ , which was adjusted for the enzyme concentration to give  $k_{\text{cat}}/K_{\text{M}}$ . The  $k_{\text{cat}}/K_{\text{M}}$  values at different pH values were fitted to a bell-shaped ionisation curve ( $k_{\text{cat}}/K_{\text{M}} = (\text{limit} \times 10^{(\text{pH} - \text{pKa}1)} / (10^{(2 \times \text{pH} - \text{pKa} - \text{pKa}2)} + 10^{(\text{pH} - \text{pKa}1)} + 1)$ ) using Prism 6.

**Michaelis-Menten kinetics.** Kinetic parameters for *BvGH123* hydrolysis of pNPGalNAc and pNPGlcNAc, were measured using a Varian Cary50 UV/visible spectrophotometer to measure the release of 4-nitrophenol at the isosbestic point ( $\lambda = 348$  nm). Reactions were performed in 50 mM sodium phosphate, 150 mM NaCl, pH 5 at  $37^{\circ}\text{C}$  using a final concentration of 17.8 nM *BvGH123*

at substrate concentrations ranging from 0.25 mM to 1.25 mM. Above this concentration the signal-to-noise deteriorated, suggesting the presence of incompletely dissolved substrate. The extinction coefficient for 4-nitrophenol under the assay conditions was determined to be  $6172 \text{ M}^{-1} \text{ cm}^{-1}$ . Kinetic parameters were calculated using the Prism 6 software package (Graphpad Scientific Software).

### **Size exclusion chromatography-multi-angle laser light scattering**

Multi angle light scattering was used to assess the oligomeric state of *BvGH123*. A sample of *BvGH123* was applied on a Superdex 200 10/300 (GE Healthcare), pre-equilibrated with 10 mM HEPES pH 7.5, 250 mM NaCl, 1mM DTT, with a flow rate of 0.5 ml/min, using a Shimadzu HPLC system (SPD-20A UV detector, LC20-AD isocratic pump system, DGU-20A3 degasser and SIL-20A autosampler). This was linked to a Wyatt HELEOS-II multi-angle light scattering detector and a Wyatt rEX refractive index detector. The column was calibrated using BSA as standard

### **Isothermal titration calorimetry**

The determination of the binding constant of Gal-thiazoline was carried out with an Auto-ITC 200 system from Malvern. A final concentration of  $17.5 \text{ } \mu\text{M}$  *BvGH123* in 50 mM MES pH 6, 150 mM NaCl was added to the calorimeter. Gal-thiazoline was dissolved at  $147 \text{ } \mu\text{M}$  and used to titrate the protein. Injections of  $2 \text{ } \mu\text{l}$  were used with a spacing of 180s. The  $K_D$ -value was calculated using the Malvern software. The measurements were carried out at  $25 \text{ } ^\circ\text{C}$ . The  $K_d$ -value was calculated using the Malvern analysis software. The Free Gibbs energy was determined to  $-46.1 \text{ kJ/mol}$  with an enthalpic contribution of  $67.8 \text{ kJ/mol}$  and an slightly unfavourable entropic contribution of  $-21.7 \text{ kJ/mol}$

**Table S1: BvGH123 X-ray data collection, processing and refinement statistics.**

|                                    | <b>BvGH123SeMet</b>                           | <b>BvGH123 apo</b>                            | <b>BvGH123<br/>GalNAc</b>                     | <b>BvGH123<br/>Gal-thiazoline</b>             |
|------------------------------------|-----------------------------------------------|-----------------------------------------------|-----------------------------------------------|-----------------------------------------------|
| PDB-ID                             |                                               | 5I7r                                          | 5I7u                                          | 5I7v                                          |
| X-ray source                       | Diamond-IO3                                   | Diamond-IO4                                   | Diamond-IO2                                   | Diamond-IO2                                   |
| Wavelength [Å]                     | 0.979420                                      | 0.979490                                      | 0.91841                                       | 0.979500                                      |
| Space group                        | P2 <sub>1</sub> 2 <sub>1</sub> 2 <sub>1</sub> |
| Resolution limit [Å]               | 2.7                                           | 1.85                                          | 2.1                                           | 2.3                                           |
| <b>Unit cell parameters</b>        |                                               |                                               |                                               |                                               |
| a [Å]                              | 55.0                                          | 55.3                                          | 55.4                                          | 55.5                                          |
| b [Å]                              | 144.7                                         | 147.8                                         | 142.2                                         | 148.4                                         |
| c [Å]                              | 145.7                                         | 150.5                                         | 145.8                                         | 147.7                                         |
| Solvent content [%]                | 51.2                                          | 53.9                                          | 50.7                                          | 53.5                                          |
| Monomers per asu                   | 2                                             | 2                                             | 2                                             | 2                                             |
| Total reflections                  | 213617(28161)                                 | 859298(42494)                                 | 445720(28436)                                 | 389448(17480)                                 |
| Unique reflections                 | 32604(4215)                                   | 106036(5148)                                  | 68163(4539)                                   | 51335(2915)                                   |
| I/σ(I)*                            | 11.6(1.4)                                     | 9.9(1.2)                                      | 12.0 (1.2)                                    | 15.6(1.1)                                     |
| completeness [%]                   | 99.5(98.2)                                    | 99.9(100)                                     | 100(100)                                      | 93.4(63.6)                                    |
| R <sub>merge</sub>                 | 0.105(1.421)                                  | 0.141(1.930)                                  | 0.104(1.530)                                  | 0.063(1.552)                                  |
| R <sub>meas</sub>                  | 0.124(1.674)                                  | 0.151(2.056)                                  | 0.114(1.670)                                  | 0.068(1.692)                                  |
| R <sub>pim</sub>                   | 0.066(0.877)                                  | 0.053(0.703)                                  | 0.044(0.664)                                  | 0.024(0.651)                                  |
| CC(1/2)                            | 0.997(0.561)                                  | 0.998(0.331)                                  |                                               | 0.999(0.434)                                  |
| <b>Refinement</b>                  |                                               |                                               |                                               |                                               |
| R <sub>cryst</sub>                 |                                               | 0.181                                         | 0.193                                         | 0.187                                         |
| R <sub>free</sub>                  |                                               | 0.219                                         | 0.227                                         | 0.221                                         |
| <b>Number of</b>                   |                                               |                                               |                                               |                                               |
| Protein residues                   |                                               | 1122                                          | 1111                                          | 1121                                          |
| Ligand                             |                                               | 0                                             | 2                                             | 2                                             |
| Water                              |                                               | 644                                           | 179                                           | 27                                            |
| r.m.s.d.                           |                                               |                                               |                                               |                                               |
| Bond (Å)                           |                                               | 0.016                                         | 0.014                                         | 0.013                                         |
| Angle (°)                          |                                               | 1.701                                         | 1.592                                         | 1.626                                         |
| Average B-factor (Å <sup>2</sup> ) |                                               |                                               |                                               |                                               |
| Protein                            |                                               | 35.5                                          | 52.4                                          | 81.1                                          |
| Ligand                             |                                               |                                               | 71.8                                          | 61.1                                          |
| Water                              |                                               | 37.3                                          | 41.5                                          | 60.4                                          |
| Ramachandran plot (%)              |                                               |                                               |                                               |                                               |
| favored/<br>allowed/disallowed     |                                               | 98/1.9/0.1                                    | 97.6/2.2/0.2                                  | 97.8/2.2/0                                    |

Values in parentheses refer to the highest resolution shell

## References

1. M. J. Fogg, A. J. Wilkinson, *Biochem. Soc. Trans.*, 2008, **36**, 771–775.
2. H. K. Sreenath, C. A. Bingman, B. W. Buchan, K. D. Seder, B. T. Burns, H. V. Geetha, W. B. Jeon, F. C. Vojtik, D. J. Aceti, R. O. Frederick, G. N. Phillips, Jr, B. G. Fox, *Protein Expr. Purif.*, 2005, **40**, 256–267.
3. F. W. Studier, *Methods Mol. Biol.*, 2014, **1091**, 17–32.
4. W. Kabsch, *Acta Crystallogr. D Biol. Crystallogr.*, 2010, **66**, 125–132.
5. G. Winter, C. M. C. Lobley, S. M. Prince, *Acta Crystallogr. D Biol. Crystallogr.*, 2013, **69**, 1260–1273.
6. P. R. Evans, G. N. Murshudov, *Acta Crystallogr. D Biol. Crystallogr.*, 2013, **69**, 1204–1214.
7. N. . Collaborative Computational Project, *Acta Crystallogr. D Biol. Crystallogr.*, 1994, **50**, 760–763.
8. P. Skubák, N. S. Pannu, *Nat. Commun.*, 2013, **4**, 2777.
9. G. M. Sheldrick, *Acta Crystallogr. A*, 2008, **64**, 112–122.
10. P. Emsley, B. Lohkamp, W. G. Scott, K. Cowtan, *Acta Crystallogr. D Biol. Crystallogr.*, 2010, **66**, 486–501.
11. G. N. Murshudov, P. Skubák, A. A. Lebedev, N. S. Pannu, R. A. Steiner, R. A. Nicholls, M. D. Winn, F. Long, A. A. Vagin, *Acta Crystallogr. D Biol. Crystallogr.*, 2011, **67**, 355–367.
12. V. B. Chen, W. B. Arendall, J. J. Headd, D. A. Keedy, R. M. Immormino, G. J. Kapral, L. W. Murray, J. S. Richardson, D. C. Richardson, *Acta Crystallogr. D Biol. Crystallogr.*, 2010, **66**, 12–21.
